# Supplementary material
Source: bioRxiv or medRxiv preprint supplement (https://www.biorxiv.org/highwire/filestream/134117/field_highwire_adjunct_files/10/444521-4.pdf)
Supplement: Supplementary file [file 444521-4.pdf]

**Wetted Condition** $R = 0.418, p < 0.0001$ 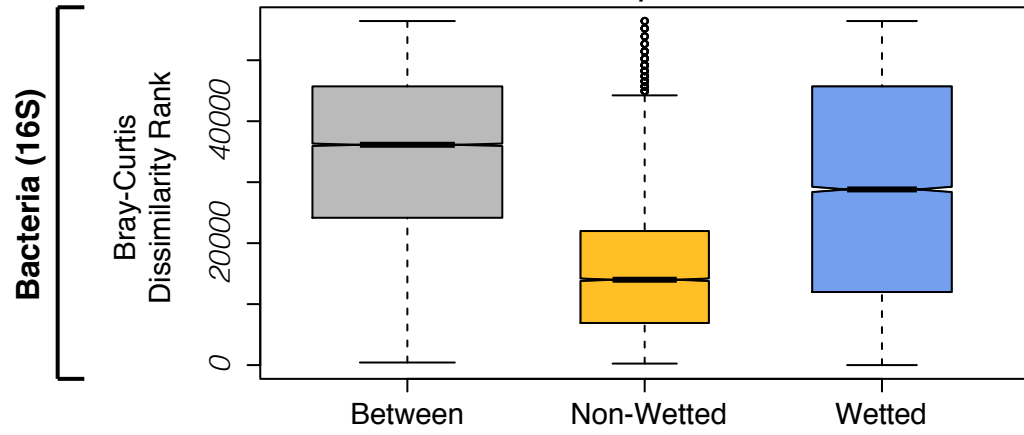**Location** $R = 0.133, p < 0.0001$ 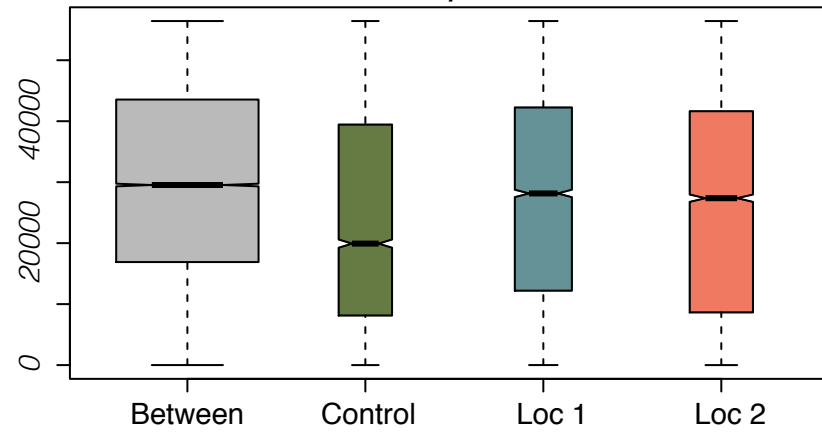**Material** $R = 0.247, p < 0.0001$ 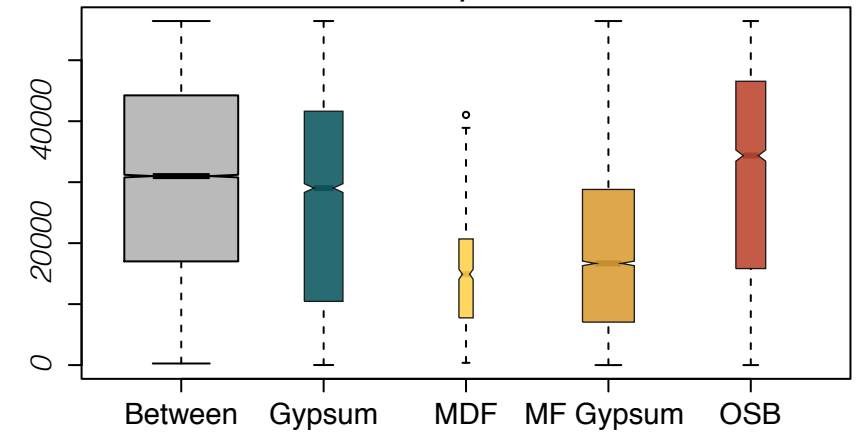**Bacteria (16S)****Fungi (ITS)** $R = 0.564, p < 0.0001$ 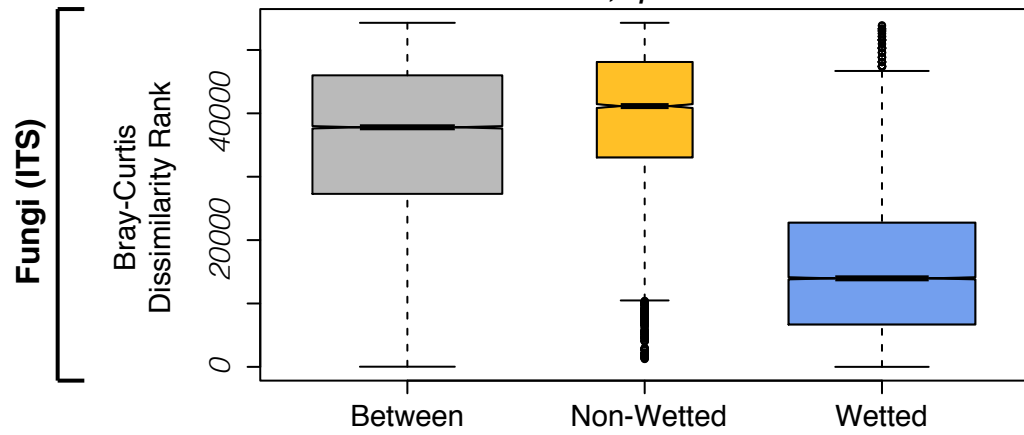 $R = 0.129, p < 0.0001$ 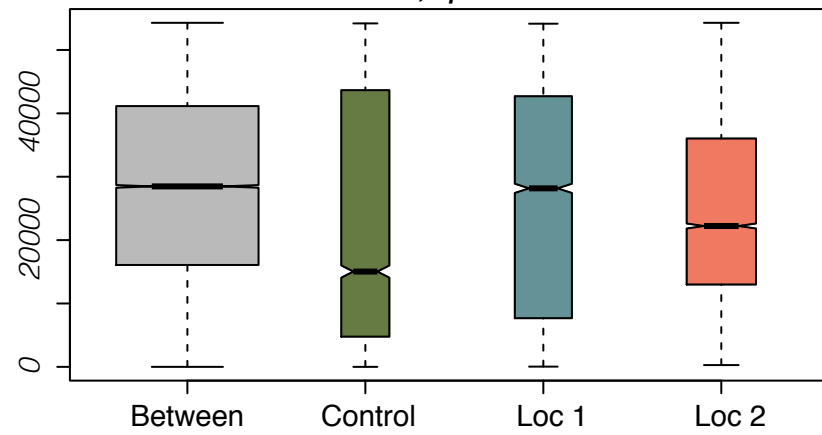 $R = -0.003, p = NS$ 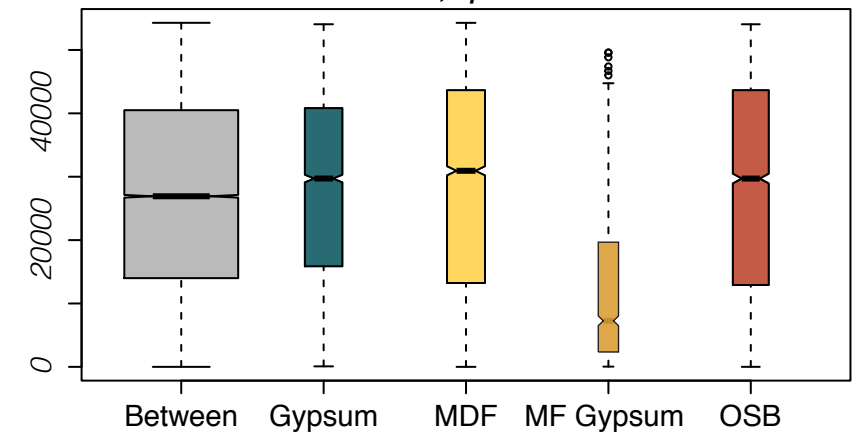 $R = 0.276, p < 0.0001$ 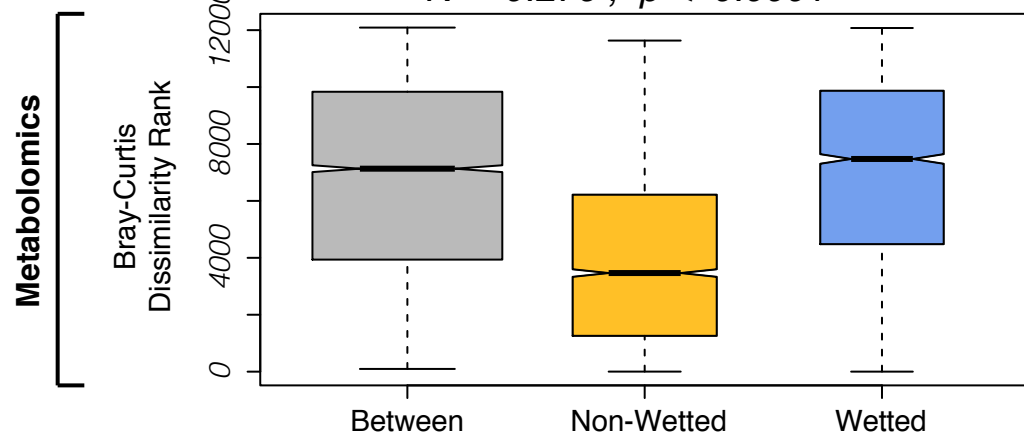 $R = 0.007, p = NS$ 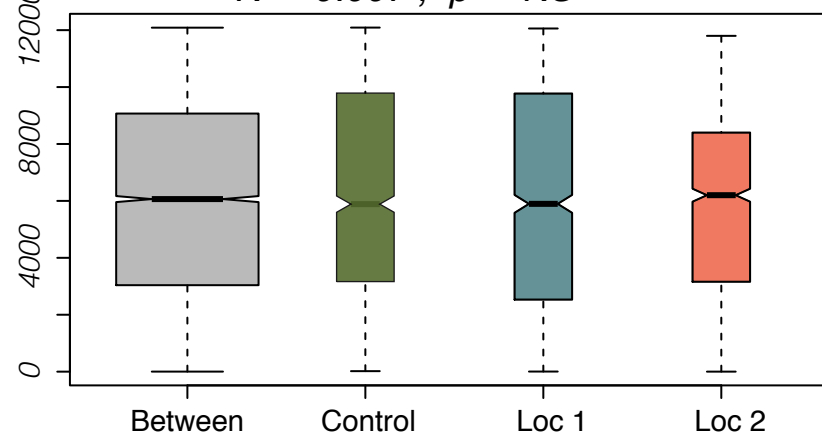 $R = 0.231, p < 0.0001$ 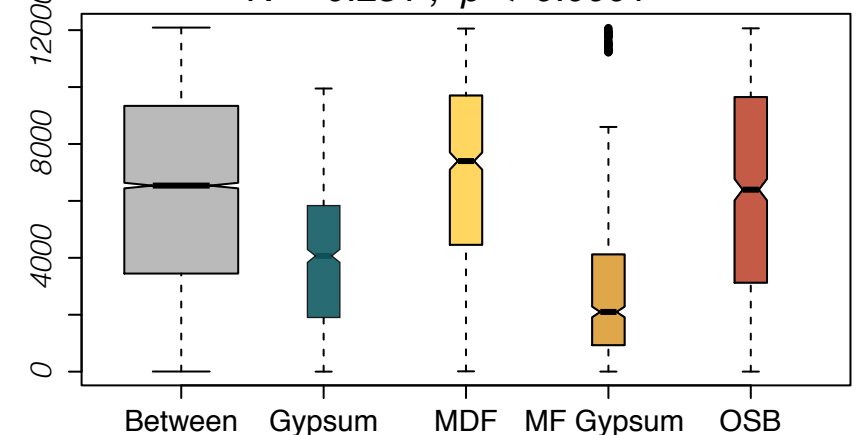**Metabolomics**
